# Supplementary material for: Presence of Epstein–Barr virus (EBV) antigens detected by sensitive methods has no influence on local immune environment in diffuse large B cell lymphoma
Source: Springer Nature journal article supplement (doi:10.1007/s00262-023-03617-x), 2024-01-27

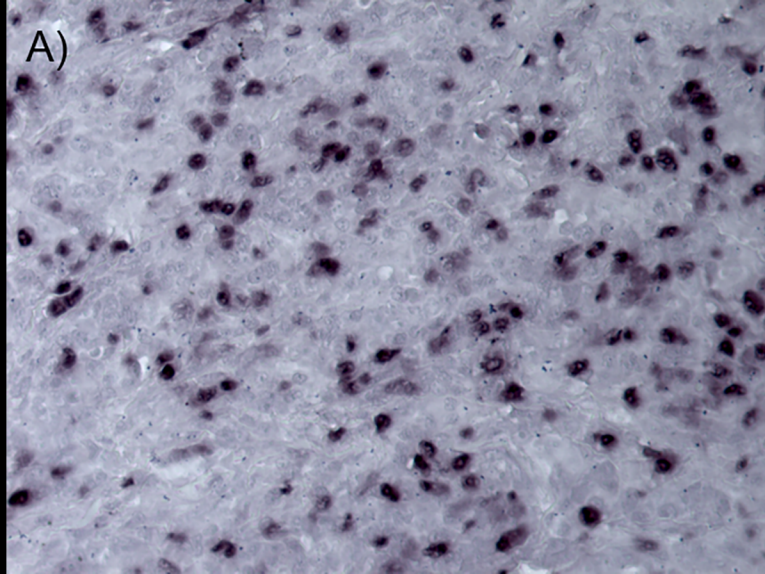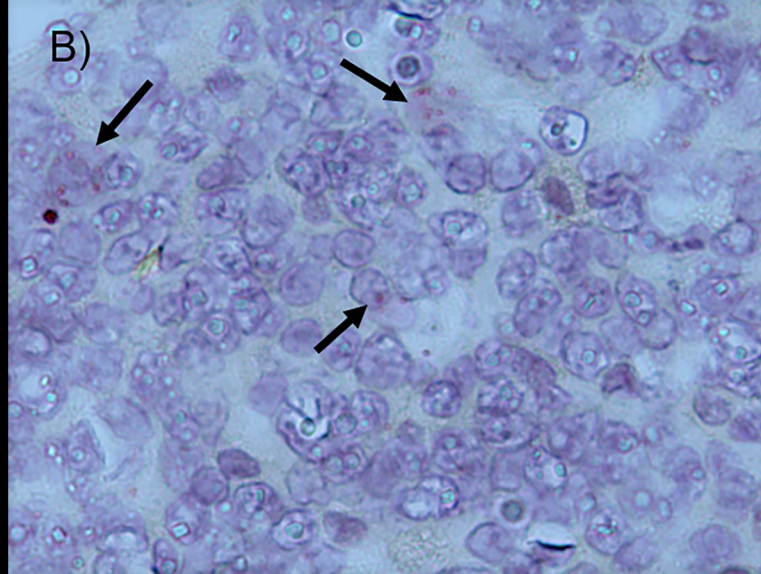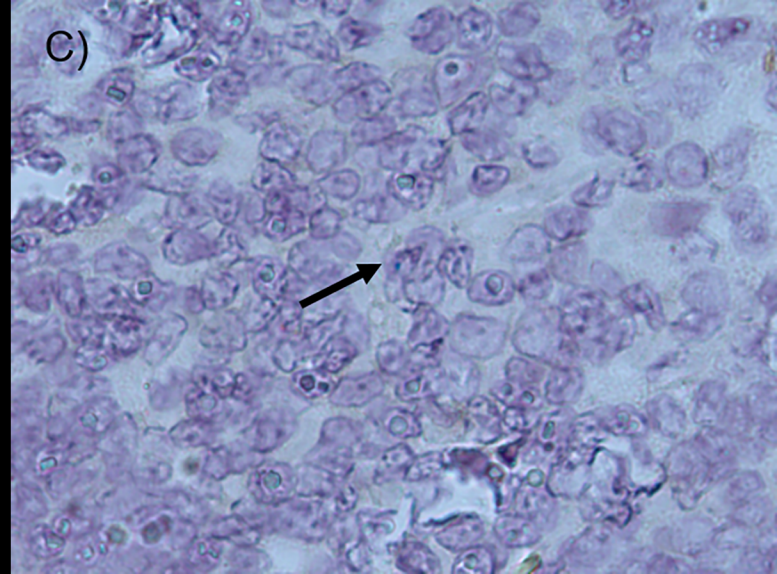

Supplement: MOESM1 [file 26667122]
